13. Vetten KB: Anaesthesia for renal transplant. S Afr Med J 44:437-444, 1970
14. Reynolds ES, Brown BR, Vandam LD: Massive hepatic necrosis after fluroxene anaesthesia. N Engl J Med 286:530-531, 1972
15. Blake DA, Rozman RS, Cascorbi HF, et al: Biotransformation of fluroxene. Biochem Pharmacol 16:1237-1247, 1967
16. Blake DA, Cascorbi HF: A note on biotransformation of fluroxene. ANESTHESIOLOGY 32: 560, 1970
17. Cascorbi HF, Singh-Amaranath AV: Fluroxene toxicity in mice. ANESTHESIOLOGY 37:480-482, 1972
18. Blake DH, Cascorbi HF, Rozman RS: Animal toxicity of trifluoroethanol and trifluoroacetic acid. Toxicol Appl Pharmacol 15:83-91, 1969
19. Slater TF: Necrogenic action of carbon tetrachloride in the rat. Nature 209:36-40, 1966
20. Udenfriend S: Arene oxide intermediates in enzymatic hydroxylation. Ann NY Acad Sci 179:295-301, 1971

### Obstetrics

**ARREST OF PREMATURE LABOR** Adrenergic  $\beta$ -mimetic compounds are potent suppressors of uterine contraction. However, these compounds also affect the cardiovascular system and may cause marked hypotension and tachycardia, thereby limiting their clinical usefulness. Ritodrine hydrochloride, a new  $\beta$ -mimetic compound, infused iv at rates of 100 to 300  $\mu\text{g}/\text{min}$ , completely inhibited uterine contractility in five of six premature labors. Moderate increases in pulse pressure and heart rate occurred. Effective inhibition of the intensity of uterine contractions accompanied by minor cardiovascular changes would seem to make ritodrine valuable for the treatment of premature labor. (Bieniarz, J., Motew, M., and Scommegna, A.: *Uterine and Cardiovascular Effects of Ritodrine in Premature Labor*. *Obstet. Gynecol.* 40: 65, 1972.)

**HYPOXIA AND FETAL HEART RATE** Fetal bradycardia which commences during a uterine contraction and persists for 30 to 60 seconds after the contraction is over is called "late deceleration." This pattern of bradycardia during labor is usually associated with an infant severely asphyxiated and depressed at birth. An experimental model was developed in the subhuman primate to monitor directly the cardiovascular and acid-base state of the near-term fetus during labor. The relationship between late deceleration of the fetal heart rate, acid-base state, and level of oxygenation was studied in 30 experiments. Late deceleration was accompanied by a decrease in fetal oxygen levels. Fetuses well oxygenated during uterine contractions showed no change in heart rate or late deceleration. The latter was abolished or suppressed when fetal oxygenation was improved by administration of a high concentration of oxygen to the mother. (James, L. S., and others: *Mechanism of Late Deceleration of the Fetal Heart Rate*. *Am. J. Obstet. Gynecol.* 113:578, 1972.)
